# Supplementary material for: Finding structure during incremental speech comprehension
Source: eLife. 2024 Apr 5;12:RP89311. doi: 10.7554/eLife.89311 (PMC10997333; doi:10.7554/eLife.89311)
Supplement: Supplementary file 1. [file elife-89311-supp1.xlsx]

## Sheet: Sheet1
Supplementary file 1. Summary of all quantitative measures used to create model RDMs
Name	Type	Description	Results
BERT parse depth vector	vector	a N-dimensional vector consisting of the BERT parse depths of all the N words in an incremental input. i.e., BERT’s structural representation of this incremental input	Figures 6A-6C, Figure 6-figure supplements 1/2/5/6/, Figure 8-figure supplement 2
BERT interpretative mismatch	scalar	cosine distance between a BERT parse depth vector and the corresponding context-free parse depth vector for the Passive or the Active interpretation given the same incremental sentence input (the smaller the mismatch with one interpretation, the higher the preference for this interpretation)	Figures 6D-6F, Figure 6-figure supplement 1
BERT Verb1 parse depth	scalar	BERT parse depth of Verb1 which is updated with each incoming later word, with increased or decreased depth reflecting the preference biased to a passive verb (i.e., Passive interpretation) or the main verb (i.e., Active interpretation) separately	Figure 7B, Figure 6-figure supplements 3/4, Figure 7-figure supplement 2
BERT Verb1 parse depth change at MV	scalar	the difference between the updated BERT parse depth of Verb1 when the actual main verb (MV) is heard and its initial value when Verb1 is first encountered, which reflects the efforts required to resolve the potential structural ambiguity	Figure 7A, Figure 7-figure supplement 2
Subject noun agenthood	scalar	the ratio of the number of the subject noun’s appearances as an agent to that of its appearances as a patient (estimated from large corpora)	Figure 8A, Figure 8-figure supplement 2
Subject noun patienthood	scalar	the ratio of the number of the subject noun’s appearances as a patient to that of its appearances as an agent (estimated from large corpora)	Figure 8B, Figure 8-figure supplement 2
Verb1 transitivity	scalar	the ratio of the frequency Verb1 takes a direct object to that it takes alternative subcategorization frames (SCFs) (estimated from large corpora or human continuation data)	Figure 6-figure supplement 4 (uncorrected)
Verb1 intransitivity	scalar	the ratio of the frequency Verb1 takes intransitive SCFs to that it takes a direct object (estimated from large corpora or human continuation data)	No significant results
PP probability	scalar	probability of a prepositional phrase continuation from the results of pre-test conducted by the end of the first verb (e.g., complete “The dog found …”)	Figure 6-figure supplement 5
MV probability	scalar	probability of a main verb continuation from the results of pre-test conducted by the end of the prepositional phrase (e.g., complete “The dog found in the park …”)	Figure 6-figure supplement 6
Active index	scalar	the product between subject noun agenthood and Verb1 intransitivity, capturing the interpretative coherence between each pair of subject noun and Verb1 for an Active interpretation	No significant results
Passive index	scalar	the product between subject noun patienthood and Verb1 transitivity, capturing the interpretative coherence between each pair of subject noun and Verb1 for a Passive interpretation	Figure 8D, Figure 8-figure supplement 1
Non-directional index	scalar	obtained by applying logarithmic transformation to the ratio measures of lexical constraints (i.e., subject noun agenthood or patienthood, Verb1 transitivity or intransitivity) before multiplying them, capturing the interpretative coherence between each pair of subject noun and Verb1 regardless of which interpretation is considered	Figure 8C
