# Supplementary material for: Finding structure during incremental speech comprehension
Source: eLife. 2024 Apr 5;12:RP89311. doi: 10.7554/eLife.89311 (PMC10997333; doi:10.7554/eLife.89311)
Supplement: Supplementary file 2. [file elife-89311-supp2.xlsx]

## Sheet: Sheet1
Supplementary file 2. Full anatomical labels of ROI abbreviations in ssRSA results
Abbreviation	Full anatomical label
opIFG	Inferior frontal gyrus, opercular part
triIFG	Inferior frontal gyrus, triangular part
orbIFG	Inferior frontal gyrus, orbital part
SFG	Superior frontal gyrus
MFG	Middle frontal gyrus
dmPFC	Dorsal medial prefrontal cortex
vPFC	Ventromedial prefrontal cortex
ACC	Anterior cingulate cortex
aTC	Anterior temporal cortex
mTC	Middle temporal cortex
pTC	Posterior temporal cortex
AG	Angular gyrus
SMG	Supramarginal gyrus
SPG	Superior parietal gyrus
IPL	Inferior parietal lobe
Prec	Precuneus
Hippo	Hippocampus
