# Supplementary material for: Finding structure during incremental speech comprehension
Source: eLife. 2024 Apr 5;12:RP89311. doi: 10.7554/eLife.89311 (PMC10997333; doi:10.7554/eLife.89311)
Supplement: Supplementary file 3. [file elife-89311-supp3.xlsx]

## Sheet: Sheet1
Supplementary file 3. Example stimuli sentence set presented to both BERT and human listeners.
Conditions
UNA	The	dog	that was	found	in	the park		was	covered in mud.
HiTrans	The	dog		found	in	the park		was	covered in mud.
LoTrans	The	dog		walked	in	the park		was	covered in mud.
PAS	The	dog	was	found	in	the park	and	was	covered in mud.
DO1	The	king		found		the coat		behind	the golden throne.
DO2	The	king		walked		the queen		around	the palace garden.
